# Supplementary material for: Untargeted Metabolomics Reveals Predominant Alterations in Lipid Metabolism Following Light Exposure in Broccoli Sprouts
Source: MDPI journal article supplement (doi:10.3390/ijms160613678), 2015-06-15
Supplement: s1 [file s1]

Supplementary Information

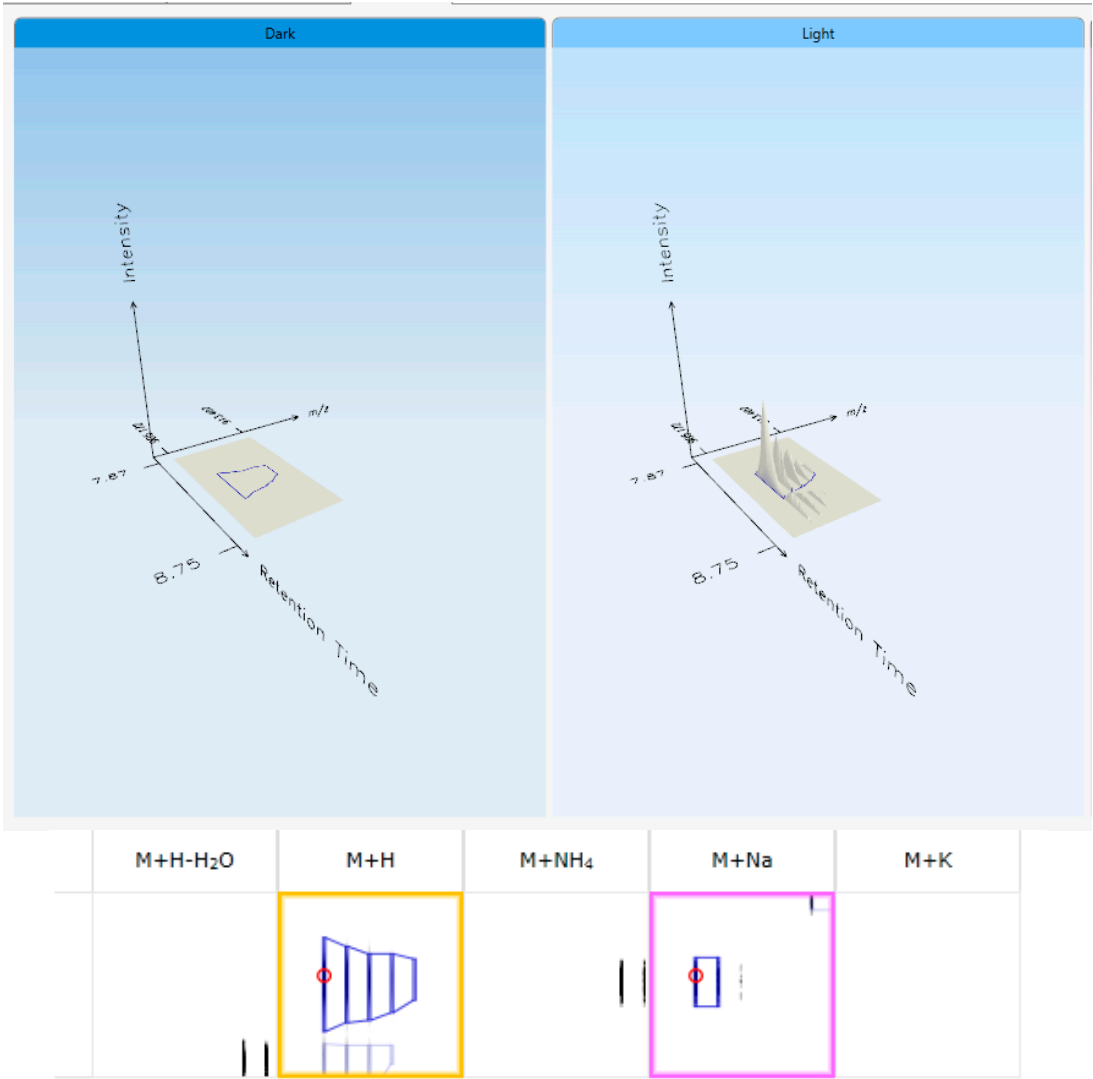

(A)

**METLIN**  
Metabolites

Mass 907.5210 with 5 ppm mass accuracy

Change Query

Total: 1 Metabolite

| METLIN ID | MASS                                                   | Δppm | NAME                                                                                                       | MS/MS           | STRUCTURE |
|-----------|--------------------------------------------------------|------|------------------------------------------------------------------------------------------------------------|-----------------|-----------|
| 3704      | [M+H] <sup>+</sup><br>m/z<br>907.5219<br>M<br>906.5146 | 0    | Chlorophyll b<br>Formula: C <sub>55</sub> H <sub>70</sub> MgN <sub>4</sub> O <sub>6</sub><br>CAS: 519-62-0 | <div>View</div> |           |

Figure S1. Cont.

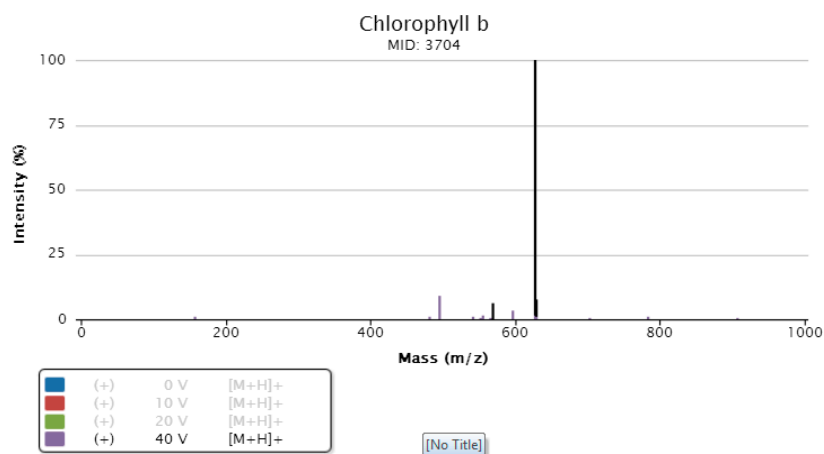

(B)

**Figure S1.** The statistical identification of metabolic alterations was followed by a review of the measurements using 3D montage and adducts deconvolution (**A**) and a search on local or online databases (e.g., METLIN, (**B**)) for structural identification. In this example, a database search lead to a putative structure of a chlorophyll *b*, which was detected only in broccoli sprouts grown in light conditions (**A**).
